# Supplementary material for: Activators and Inhibitors of NRF2: A Review of Their Potential for Clinical Development
Source: Hindawi journal article supplement (doi:10.1155/2019/9372182), 2019-07-14
Supplement: f1 [file 9372182.f1.pdf]

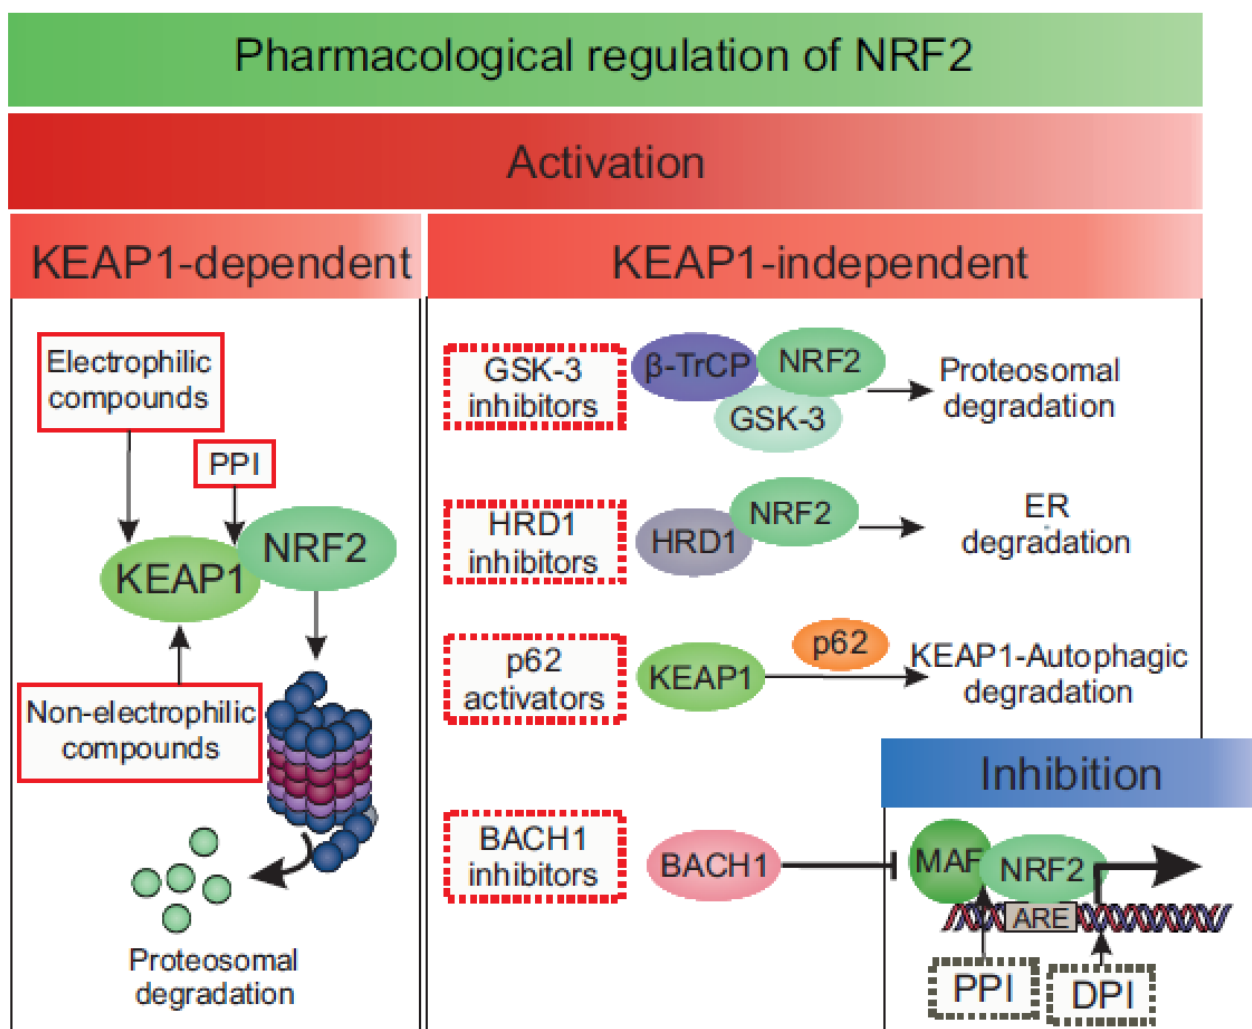

Graphical abstract
